# Supplementary figures and images for: Phospholipase D activity couples plasma membrane endocytosis with retromer dependent recycling
Source: eLife journal article supplement (doi:10.7554/elife.18515), 2016-11-15

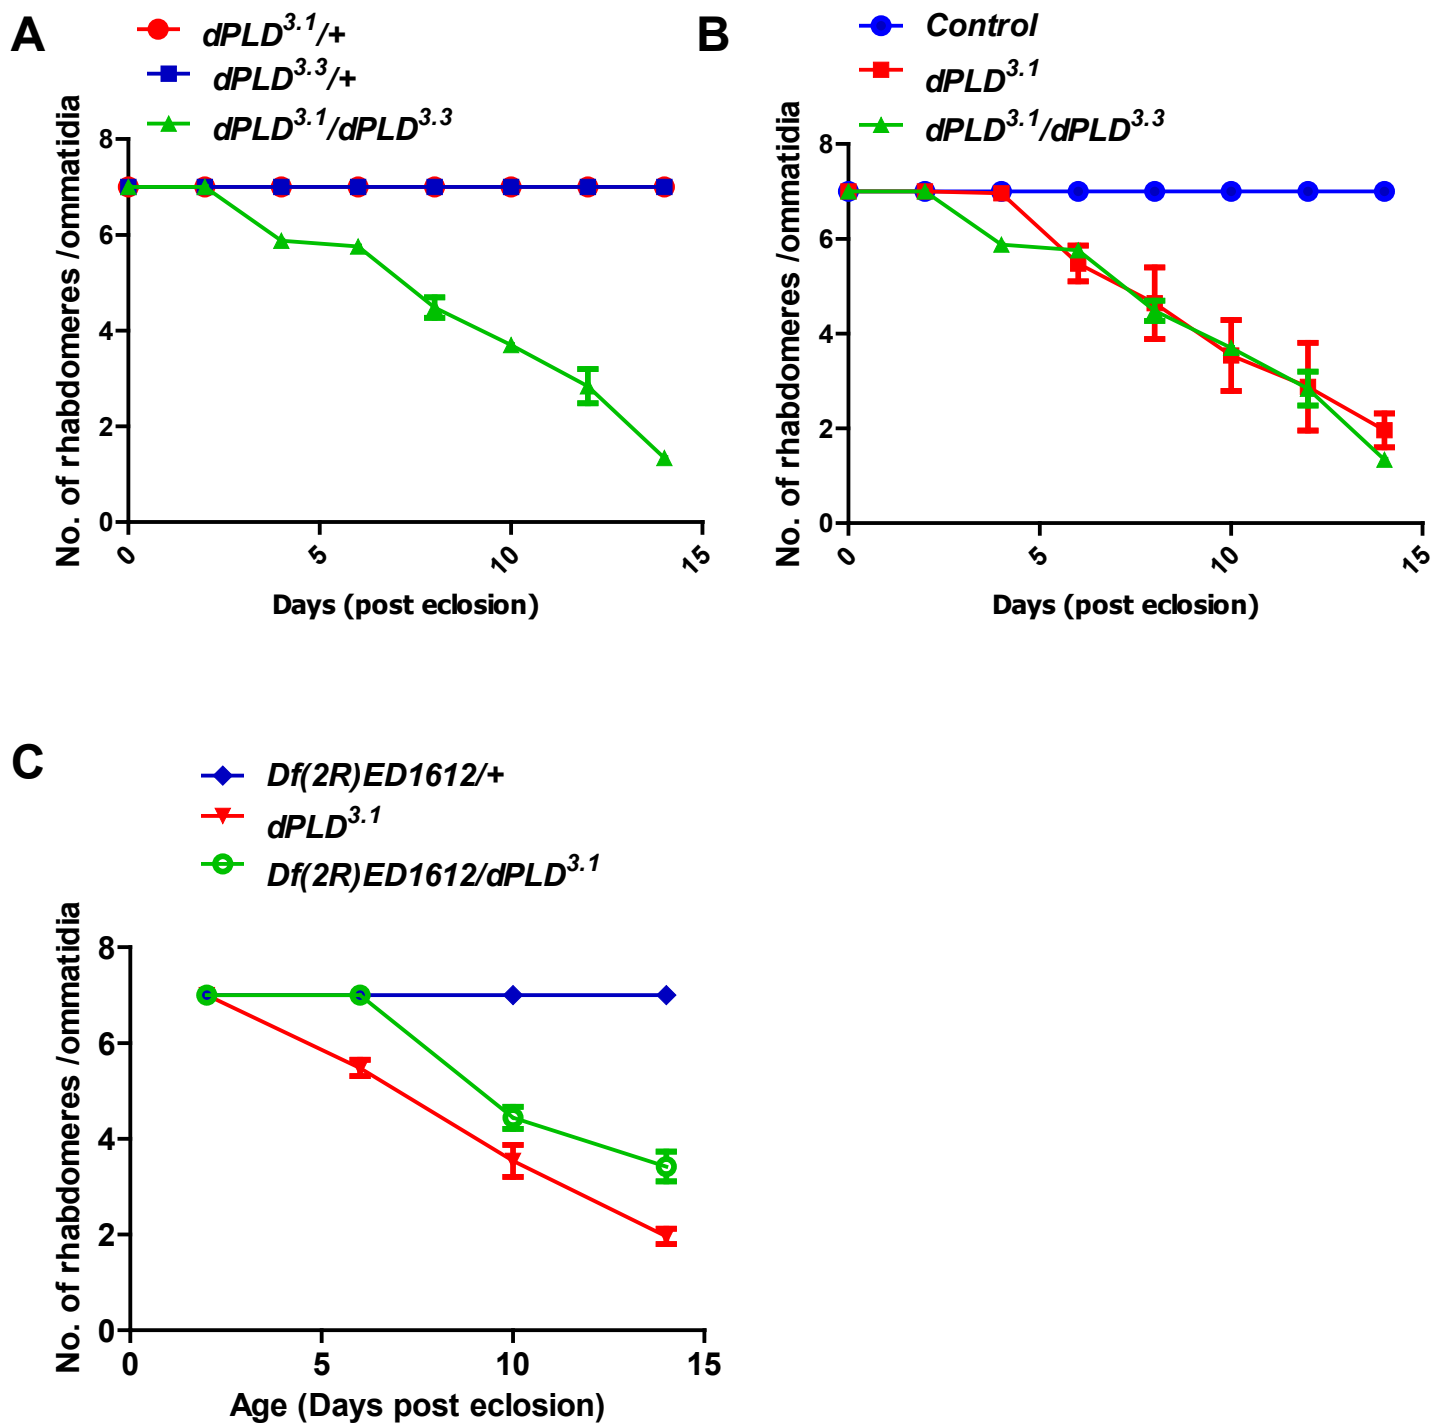

Figure 3 S1

Supplement: supp [file elife-18515-supp-v1.zip]

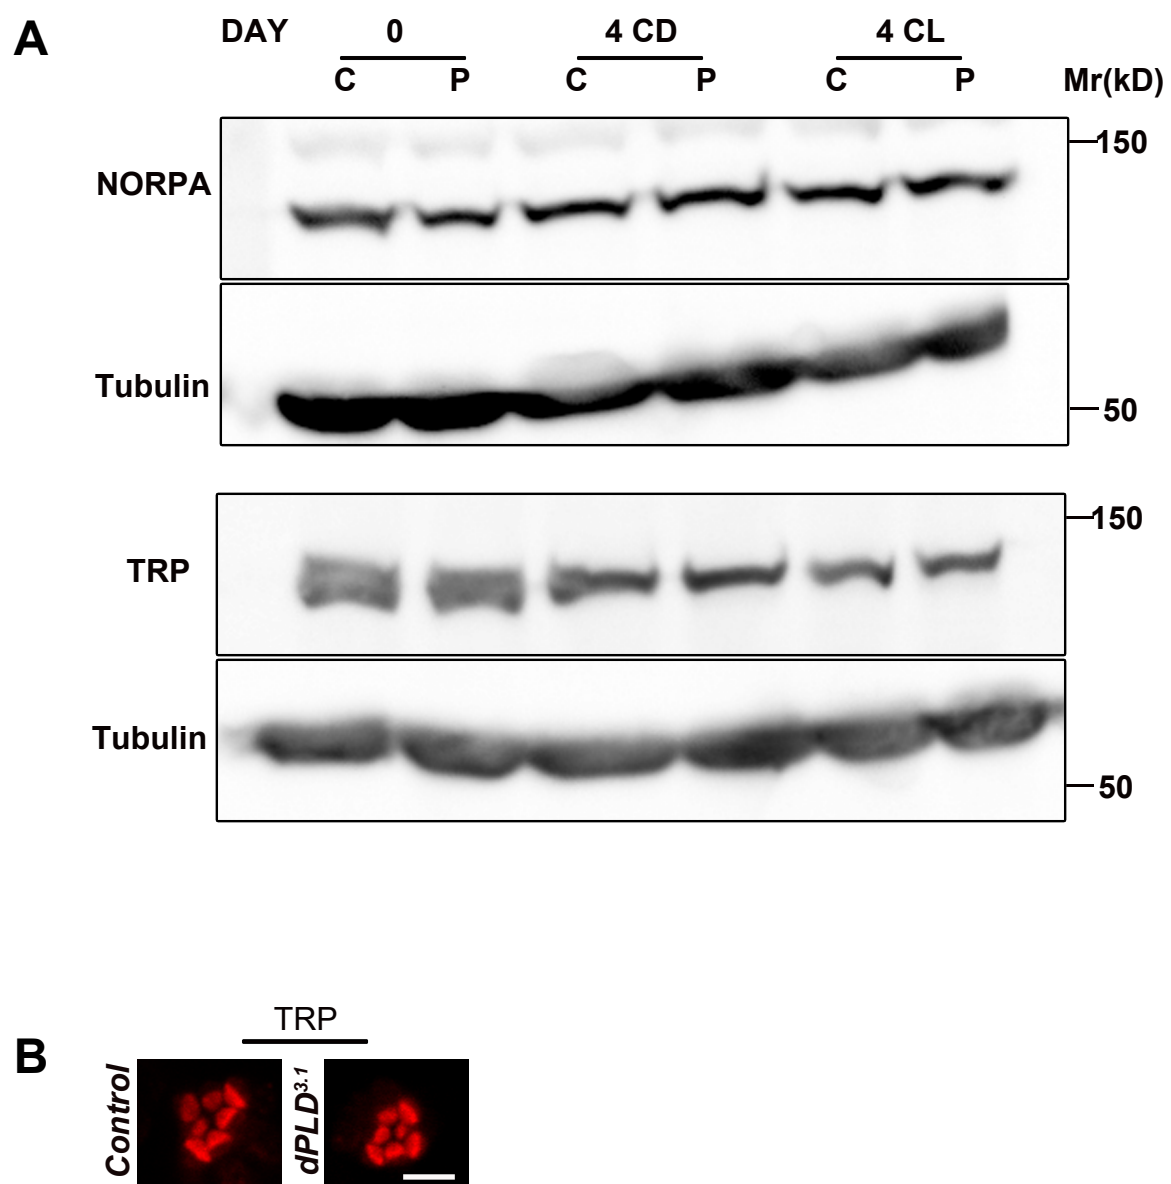

Figure 2 S2

Supplement: supp [file elife-18515-supp-v1.zip]

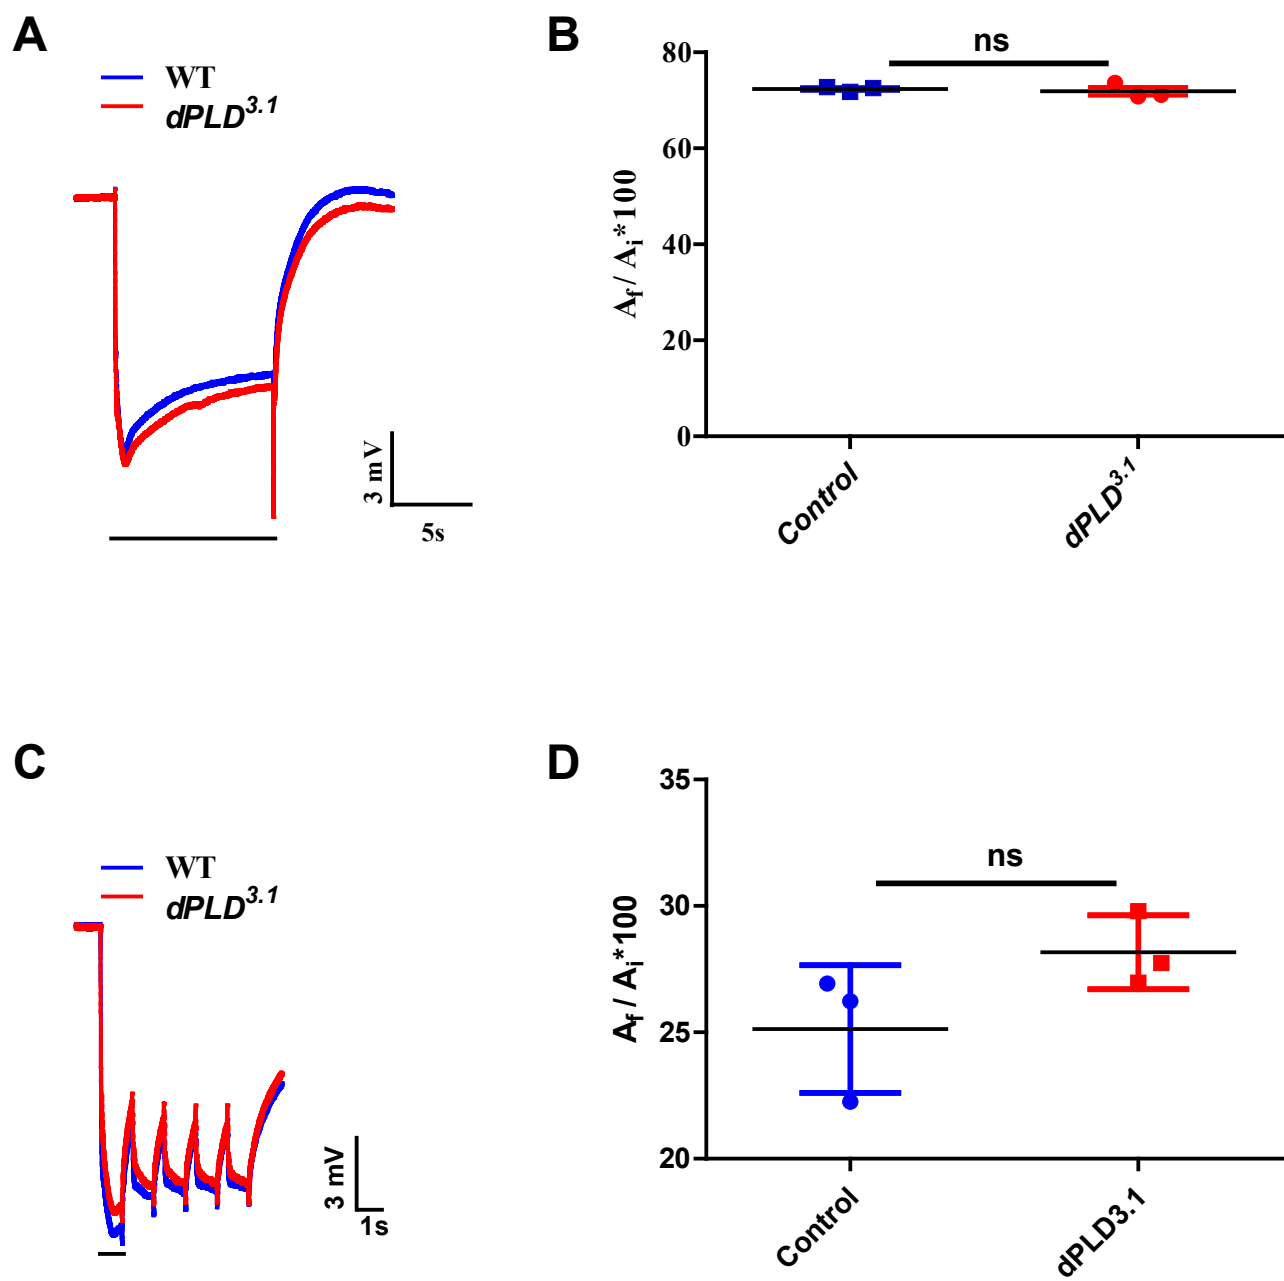

Figure 2 S3

Supplement: supp [file elife-18515-supp-v1.zip]

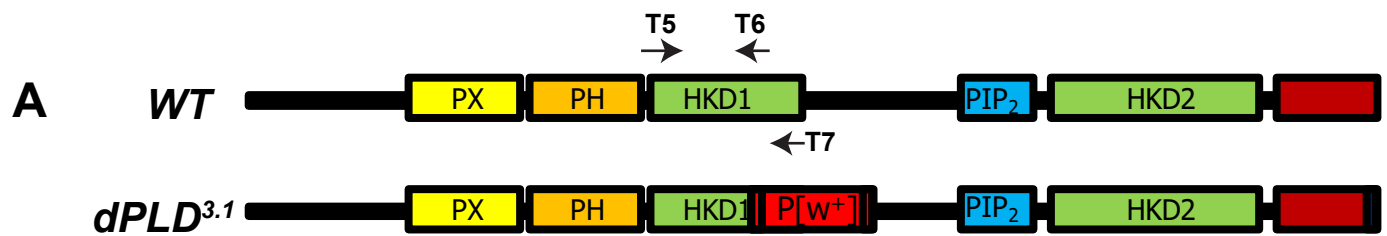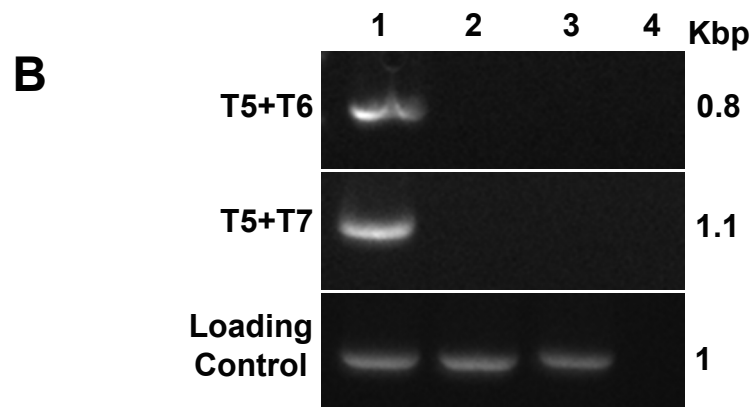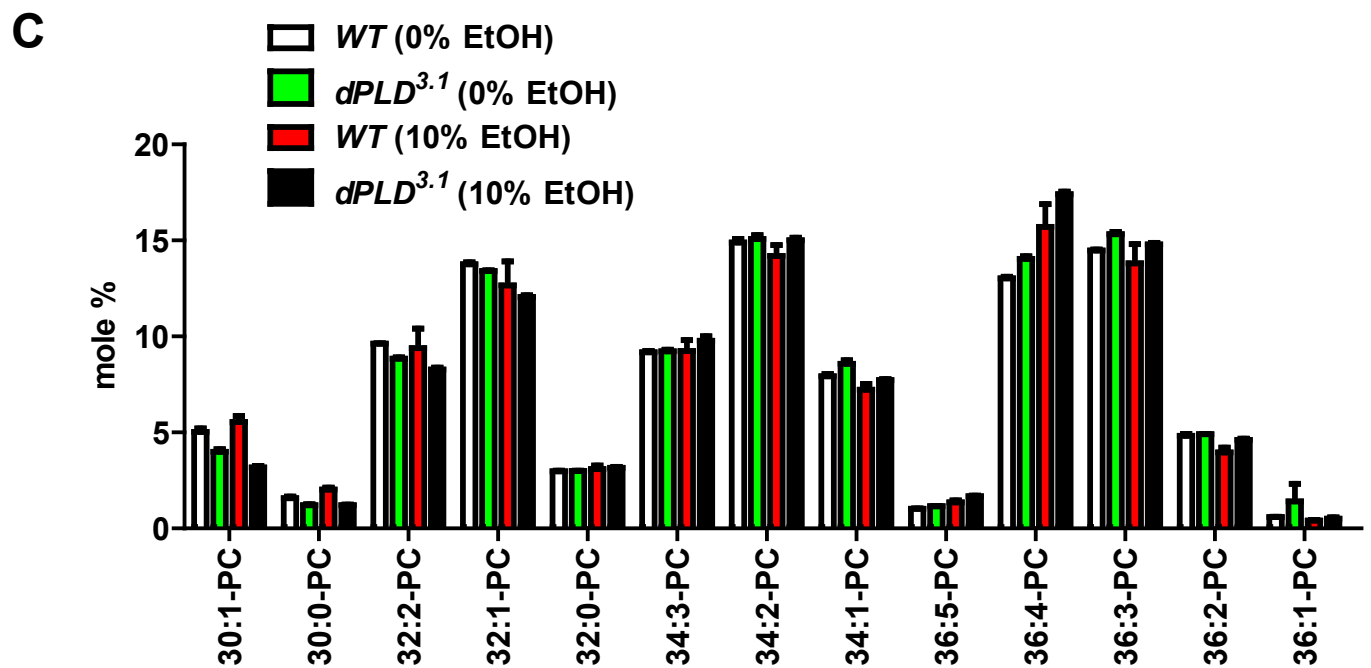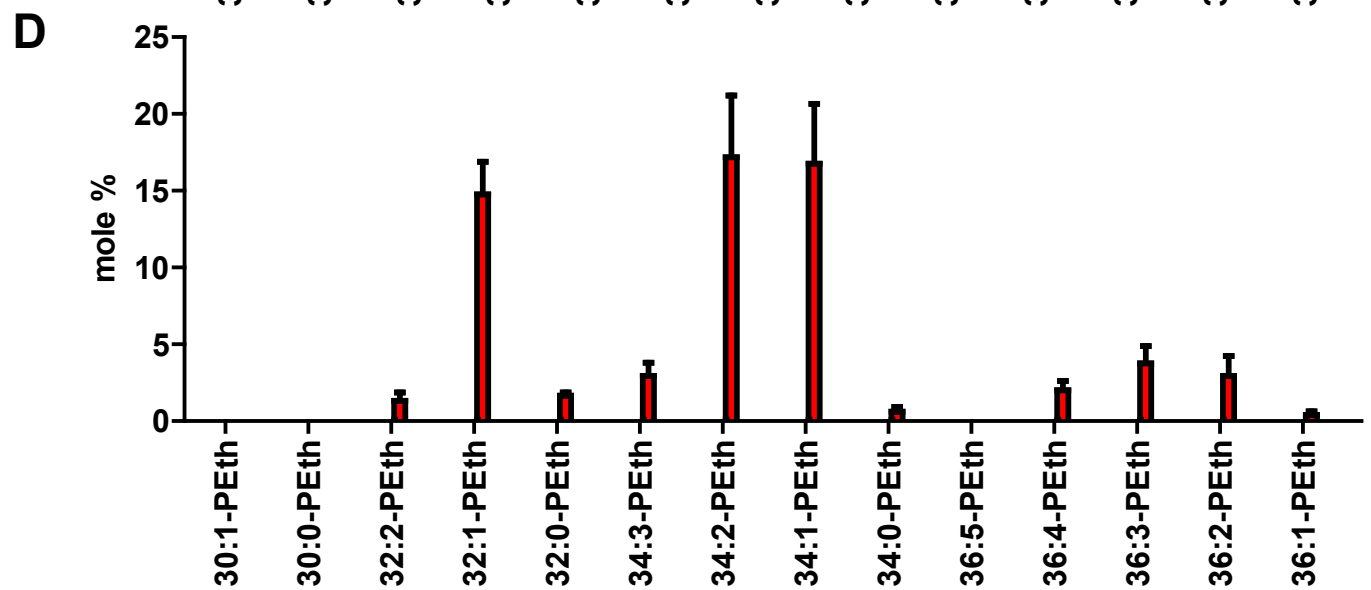

Figure 2 S1

Supplement: supp [file elife-18515-supp-v1.zip]

**A**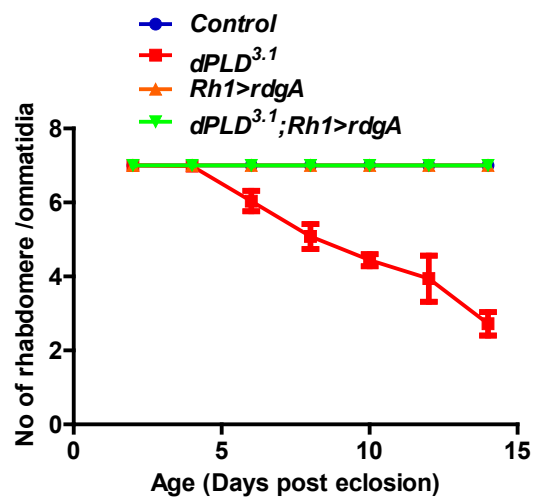**B**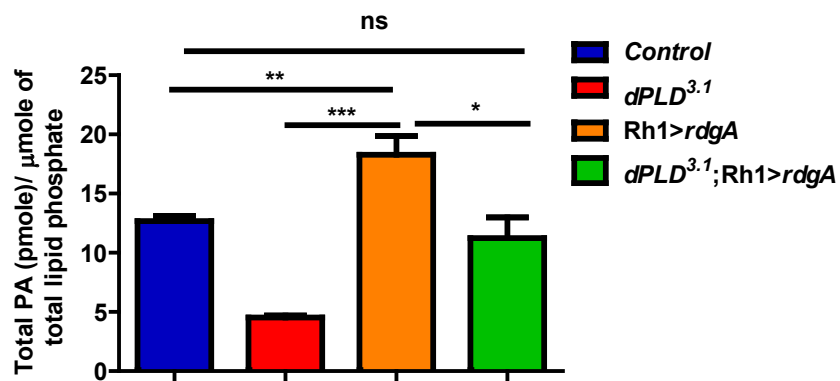

Figure 4 S1

Supplement: supp [file elife-18515-supp-v1.zip]
